# Supplementary material for: The last-born daughter cell contributes to division orientation of Drosophila larval neuroblasts
Source: PubMed Central journal article supplement (PMC6138640; doi:10.1038/s41467-018-06276-0), 2018-09-14
Supplement: 41467_2018_6276_MOESM3_ESM.pdf [file 41467_2018_6276_MOESM3_ESM.pdf]

## Description of Additional Supplementary Files

### File Name: Supplementary Movie 1

**Description:** Three successive divisions of a neuroblast expressing Worniu-GAL4-driven PH::GFP, shown in **Supplementary Figure 1A**. Middle panel: orthogonal slice along the y axis of the left panel. Right panel: 3D reconstruction of the neuroblast volume, sliced in half through its division axis. Time in hh:mm:ss, scale bar: 5  $\mu$ m.

### File Name: Supplementary Movie 2

**Description:** Two successive divisions of a neuroblast expressing PH::RFP (magenta), the centriole marker Asl::YFP and the apical polarity marker Baz::GFP (green), shown in **Supplementary Figure 1C**. Baz::GFP starts accumulating apically as the neuroblast starts rounding up, around 00:30:00. Arrow: apical centriole. Arrowheads: limits of the apical Baz crescent. Time in hh:mm:ss, scale bar: 5  $\mu$ m.

### File Name: Supplementary Movie 3

**Description:** Immediate deformation of a neuroblast expressing Worniu-GAL4-driven PH::GFP, following the ablation of its last daughter cell (occurring at 0s, red lightning symbol). Scale bar: 5  $\mu$ m

### File Name: Supplementary Movie 4

**Description:** Two successive divisions of neuroblasts expressing Worniu-GAL4-driven PH::GFP, following control ablation (red lightning symbol). Arrows: division axis. Time in hh:mm:ss, scale bar: 5  $\mu$ m.

### File Name: Supplementary Movie 5

**Description:** Two successive divisions of neuroblasts expressing Worniu-GAL4-driven PH::GFP, following last-born GMC ablation (red lightning symbol). Arrows: division axis. Time in hh:mm:ss, scale bar: 5  $\mu$ m.

### File Name: Supplementary Movie 6

**Description:** Two successive divisions of neuroblasts expressing Worniu-GAL4-driven PH::GFP, following control ablation (red lightning symbol) and ending in a high misalignment of the second division axis. Arrows: division axis. Time in hh:mm:ss, scale bar: 5  $\mu$ m.

### File Name: Supplementary Movie 7

**Description:** Two successive divisions of neuroblasts expressing Worniu-GAL4-driven PH::GFP, following last-born GMC ablation (red lightning symbol) and ending in a high misalignment of the second division axis. Arrows: division axis. Time in hh:mm:ss, scale bar: 5  $\mu$ m.

### File Name: Supplementary Movie 8

**Description:** Two successive divisions of a neuroblast expressing Worniu-GAL4-driven PH::GFP, ending after the formation of plasma membrane extensions at the neuroblast/last-born GMC interface, followed by a high-resolution series of confocal slices through the neuroblast volume, followed by a 3D reconstruction of this volume. Time in hh:mm:ss, scale bar: 5  $\mu$ m.

### File Name: Supplementary Movie 9

**Description:** Neuroblast expressing Cindr::GFP at endogenous levels. Cindr::GFP localizes to the neuroblast/GMC interface, to the plasma membrane extensions originating from it and to centrosomes. Time in hh:mm:ss, scale bar: 5  $\mu$ m.

### File Name: Supplementary Movie 10

**Description:** Two successive divisions of a neuroblast expressing PH::RFP (magenta), the centriole marker Asl::YFP, the apical polarity marker Baz::GFP (green), and Worniu-GAL4-driven *cindr* RNAi, shown in **Figure 5B**. Following the first division, the apical centrosome maintains its position throughout interphase, a Baz crescent forms at an abnormal location during cellular rounding, the spindle properly aligns with this crescent and the neuroblast divides with a 53° deviation from the first division axis. Arrow: apical centriole. Arrowheads: limits of the apical Baz crescent. Time in hh:mm:ss, scale bar: 5  $\mu$ m.
